# Supplementary material for: Antiscaling efficacy of CaCO3and CaSO4on polyethylene glycol (PEG)-modified reverse osmosis membranes in the presence of humic acid: interplay of membrane surface properties and water chemistry
Source: Royal Society of Chemistry journal article supplement (doi:10.1039/c6cp08569e), 2017-01-01
Supplement: c6cp08569e1.pdf [file c6cp08569e1.pdf]

## Electronic Supplementary Material for

# **Antiscaling Efficacy of $\text{CaCO}_3$ and $\text{CaSO}_4$ on Polyethylene Glycol (PEG)-Modified Reverse Osmosis Membranes in the Presence of Humic Acid: Interplay of Membrane Surface Properties and Water Chemistry**

Jessica R. Ray<sup>1,†</sup>, Whitney Wong<sup>2</sup>, and Young-Shin Jun<sup>1,\*</sup>

<sup>1</sup>*Department of Energy, Environmental & Chemical Engineering,  
Washington University in St. Louis, St. Louis, MO 63130*

<sup>2</sup>*Department of Biomedical Engineering,  
University of Texas at Austin, Austin, TX 78713*

E-mail: [ysjun@seas.wustl.edu](mailto:ysjun@seas.wustl.edu)

Phone: (314) 935-4539

Fax: (314) 935-7211

<http://encl.engineering.wustl.edu/>

Submitted: January 2017

***Physical Chemistry Chemical Physics***

**\*To Whom Correspondence Should be Addressed**

<sup>†</sup>Current address: Department of Civil & Environmental Engineering, University of California-Berkeley, Berkeley, CA 94720, USA

**Summary:** Five pages and three figures and references.

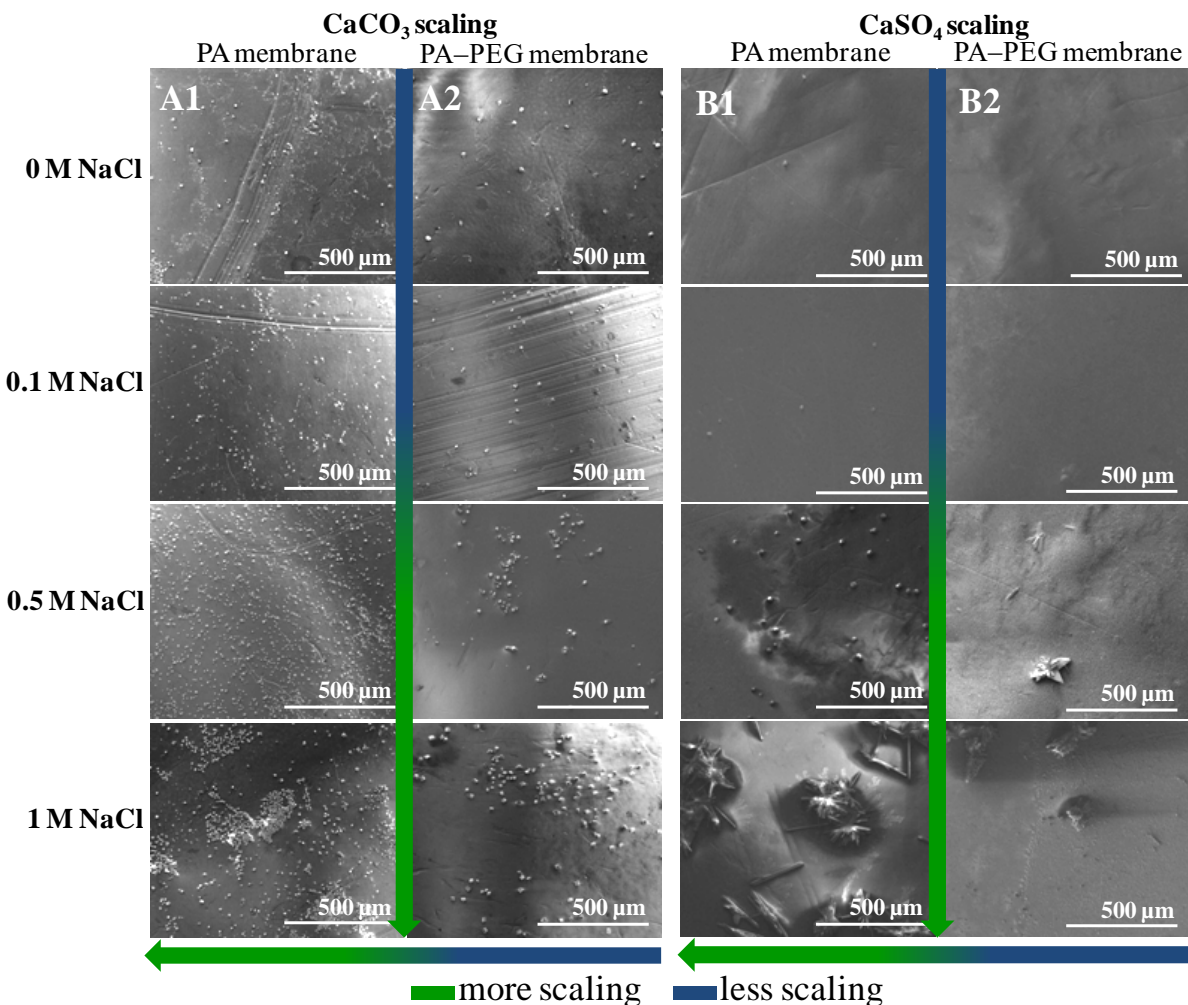

**Figure S1.** SEM micrographs of batch (A)  $\text{CaCO}_3$  (SI, calcite = 2.16) and (B)  $\text{CaSO}_4$  (SI, gypsum = 0.45) mineral colloidal formation experiments at increasing salinities for (1) PA and (2) PA-PEG membranes. The concentrations of reactant materials were adjusted to maintain the same calcite and gypsum SI values to better understand the effect of increasing salinity. The  $\text{CaCO}_3$  and  $\text{CaSO}_4$  scaling experiments on PA and PA-PEG were conducted for 2 h prior to gentle rinsing and drying for SEM analysis.

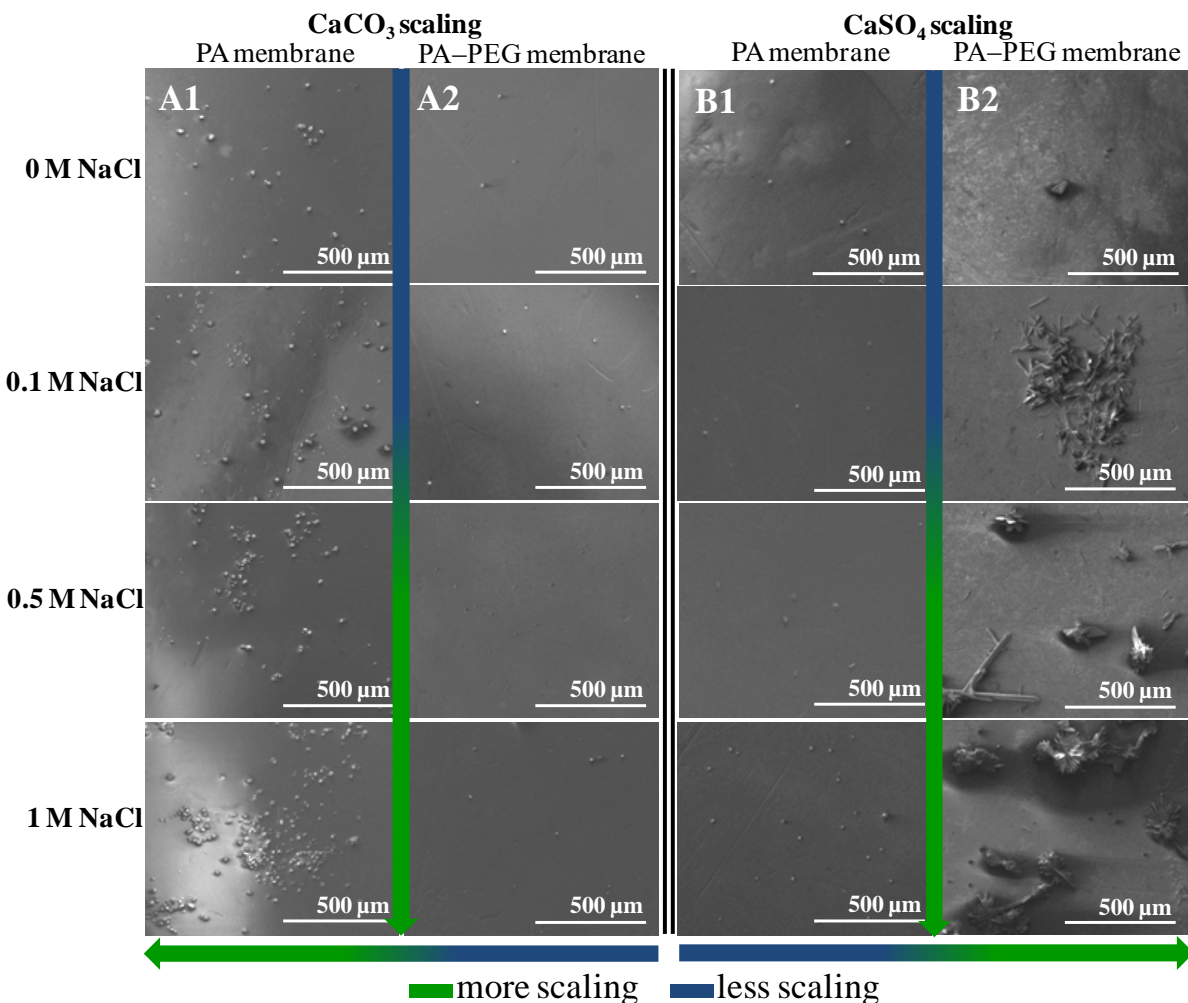

**Figure S2.** SEM micrographs of batch (A) CaCO<sub>3</sub> (SI, calcite = 2.16) and (B) CaSO<sub>4</sub> (SI, gypsum = 0.45) mineral colloidal formation experiments at increasing salinities for (1) PA and (2) PA-PEG membranes in the presence of 10 mg/L humic acid (HA). The NaHCO<sub>3</sub> + CaCl<sub>2</sub> and Na<sub>2</sub>SO<sub>4</sub> + CaCl<sub>2</sub> reactant solutions were prepared in 10 mg/L HA at the corresponding salinity before mixing to initiate the colloidal formation experiment. The concentrations of reactant materials were adjusted to maintain the same calcite and gypsum SI values to better understand the effect of increasing salinity. The CaCO<sub>3</sub> and CaSO<sub>4</sub> scaling experiments on PA and PA-PEG were conducted for 2 h prior to gentle rinsing and drying for SEM analysis.

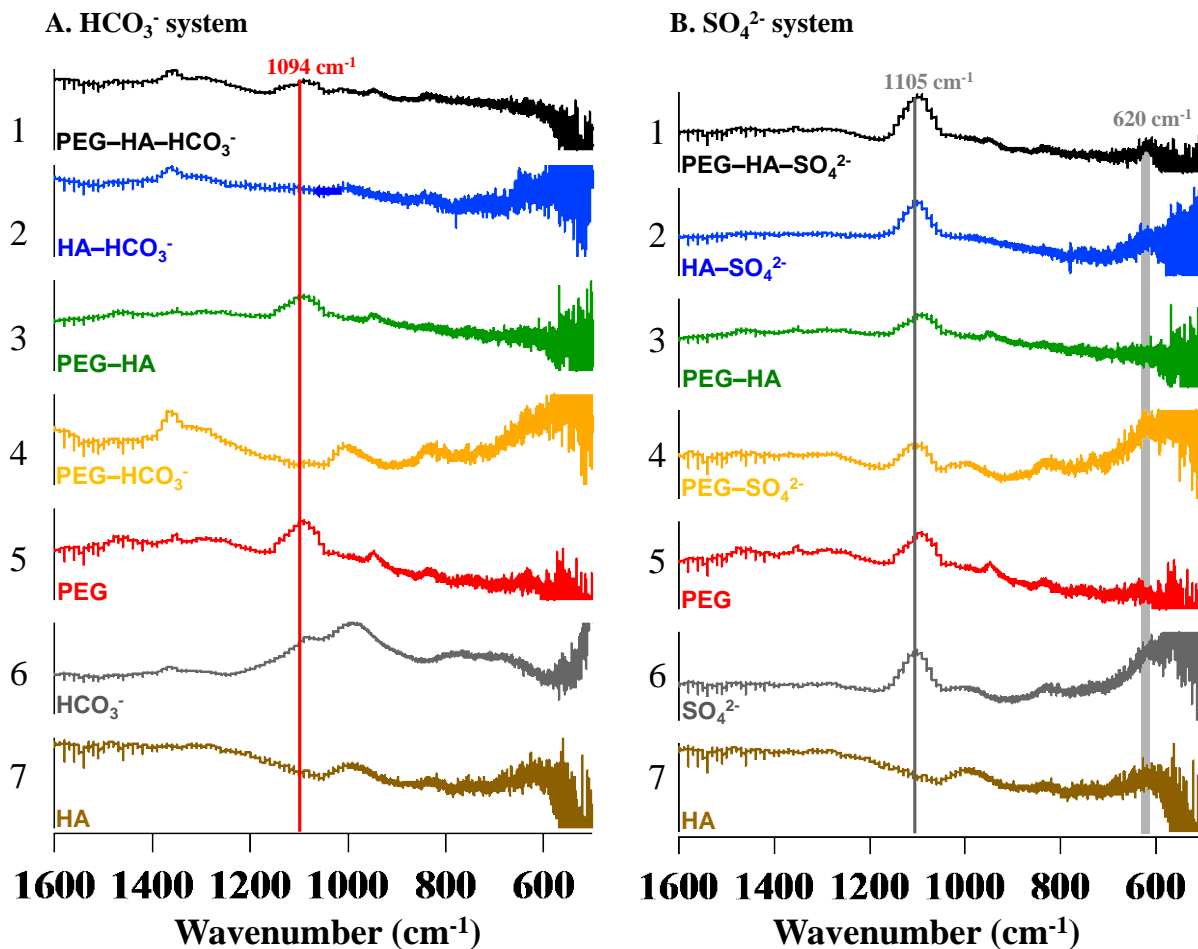

**Figure S3.** ATR-FTIR data for (A) the carbonate ( $\text{HCO}_3^-$ ) and (B) sulfate ( $\text{SO}_4^{2-}$ ) system with representation from individual species, binary, and ternary mixtures. Solutions were prepared containing mixtures of 0.1 M  $\text{Na}_2\text{SO}_4$ , 0.1 M  $\text{NaHCO}_3$ , 0.1 M PEG, and/or 10 mg/L HA. The peak at  $1094\text{ cm}^{-1}$  in the PEG spectra corresponds to stretching vibrations of the C–O–C bond[1,2] of the PEG structure and shifting of this peak indicates binding or favorable interactions of PEG with other species in the system.[3] For system (A) investigating the PEG, HA, and  $\text{HCO}_3^-$  system, there are contributions from PEG, HA, and  $\text{HCO}_3^-$  in the ternary mixture indicating weak or negligible bonding between each of three components in the system. In system (B), the peaks at  $1105\text{ cm}^{-1}$  and  $620\text{ cm}^{-1}$  correspond to the  $\text{SO}_4^{2-}$  anion (B6).[4-7] In comparing B1 and B3 spectra, the enhanced sulfate peaks at  $1105$  and  $620\text{ cm}^{-1}$  in B1 compared to B3 suggest binding with sulfate species. Because the sulfate binding on PEG–HA will decrease surface charge further, this may result in more  $\text{Ca}^{2+}$  attractions in the PEG–HA system. As such,  $\text{SO}_4^{2-}$ -complexed HA may form a layer on the PEG membrane surface to promote  $\text{CaSO}_4$  formation.

## REFERENCES

- [1] D.-H. Jung, Y. Koan Ko, H.-T. Jung, Aggregation behavior of chemically attached poly(ethylene glycol) to single-walled carbon nanotubes (SWNTs) ropes, *Materials Science and Engineering: C* 24(1–2) (2004) 117-121.
- [2] K. Yamashita, T. Nakate, K. Okimoto, A. Ohike, Y. Tokunaga, R. Ibuki, K. Higaki, T. Kimura, Establishment of new preparation method for solid dispersion formulation of tacrolimus, *Int. J. Pharm.* 267(1–2) (2003) 79-91.
- [3] K. Shameli, M. Bin Ahmad, S.D. Jazayeri, S. Sedaghat, P. Shabanzadeh, H. Jahangirian, M. Mahdavi, Y. Abdollahi, Synthesis and Characterization of Polyethylene Glycol Mediated Silver Nanoparticles by the Green Method, *Int. J. Mol. Sci.* 13(6) (2012) 6639.
- [4] M. Omastová, M. Trchová, J. Kovářová, J. Stejskal, Synthesis and structural study of polypyrroles prepared in the presence of surfactants, *Synth. Met.* 138(3) (2003) 447-455.
- [5] D.B. Parry, M.G. Samant, H. Seki, M.R. Philpott, K. Ashley, In situ Fourier transform infrared spectroelectrochemical study of bisulfate and sulfate adsorption on gold, with and without the underpotential deposition of copper, *Langmuir* 9(7) (1993) 1878-1887.
- [6] T. Yamaguchi, T. Jin, K. Tanabe, Structure of acid sites on sulfur-promoted iron oxide, *The Journal of Physical Chemistry* 90(14) (1986) 3148-3152.
- [7] K. Nakamoto, J. Fujita, S. Tanaka, M. Kobayashi, Infrared Spectra of Metallic Complexes. IV. Comparison of the Infrared Spectra of Unidentate and Bidentate Metallic Complexes, *J. Am. Chem. Soc.* 79(18) (1957) 4904-4908.
